# Supplementary material for: Rapid Assessment Method for Evaluation of the Weighted Contribution of Anthropogenic Pollution: A Case Study of Lake Burullus, Egypt
Source: MDPI journal article supplement (doi:10.3390/w13233337), 2021-11-24
Supplement: s1 [file s1]

Archive with 1 entries (1 files):
- water-1420562-supplementary.pdf
