# Supplementary material for: Rapid Assessment Method for Evaluation of the Weighted Contribution of Anthropogenic Pollution: A Case Study of Lake Burullus, Egypt
Source: MDPI journal article supplement (doi:10.3390/w13233337), 2021-11-24
Supplement: s1 [file s1 › water-1420562-supplementary.pdf]

**Supplementary Table S1.** Average root depth for various summer and winter crops (in m)

| Crops ID | Winter crop     | Root depth, m | Crops ID | Summer crop     | Root depth, m |
|----------|-----------------|---------------|----------|-----------------|---------------|
| 1        | Wheat           | 0.35          | 1        | Maize           | 0.4           |
| 2        | Long clover     | 0.2           | 2        | Cotton          | 0.8           |
| 3        | Barley          | 0.4           | 3        | Onion           | 0.3           |
| 4        | Sugar Beet      | 0.9           | 4        | Tomato          | 0.5           |
| 5        | Garlic          | 0.12          | 5        | Other vegetable | 0.3           |
| 6        | Tomato          | 0.5           | 6        | Sorghum         | 0.2           |
| 7        | Other vegetable | 0.3           | 7        | Other crops     | 0.3           |
| 8        | Onion           | 0.3           | 8        | Rice            | 0.2           |
| 9        | Other crops     | 0.3           | 9        | Soybeans        | 0.5           |
| 10       | Broad Bean      | 0.5           | 10       | Peanuts         | 0.5           |
| 11       | Lentil          | 0.6           | 11       | Sunflower       | 0.8           |
| 12       | Flax            | 1.2           | 12       | Potatoes        | 0.5           |
| 13       | Tahrish         | 0.5           | 13       | Yellow Maize    | 0.4           |
| 14       | Potatoes        | 0.5           | 14       | Sesame          | 0.5           |

Sources:

- ✓ Phocaides, A., 2007. *Handbook on pressurized irrigation techniques*, Rome: Food and Agriculture Organization of the United Nations.
- ✓ Jeon, W.T., 2006. *Rice Root Distribution and Rice-Based Cropping Systems for Sustainable Soil–Rhizosphere Management*, Crop Technology Transfer Division National Institute of Crop Science Rural Development Administration 209 Seodun-Dong Suwon 441-857 Korea.
- ✓ Soil and Health Library. Chapter X: Root Habits of Sorghum. <https://soilandhealth.org/wp-content/uploads/01aglibrary/010139fieldcroproots/010139ch10.html> Accessed date: 4 April 2021.
- ✓ University of California Agriculture and Natural Resources, 2013. Crop Rooting Depth. [http://ucmanagedrought.ucdavis.edu/Agriculture/Irrigation\\_Scheduling/Evapotranspiration\\_Scheduling\\_ET/Frequency\\_of\\_Irrigation/Crop\\_Rooting\\_Depth/](http://ucmanagedrought.ucdavis.edu/Agriculture/Irrigation_Scheduling/Evapotranspiration_Scheduling_ET/Frequency_of_Irrigation/Crop_Rooting_Depth/) Accessed date: 5 April 2021.
- ✓ FAO, 1998, Scaling soil nutrient balances, Natural Resources Management and Environment Department. <http://www.fao.org/3/y5749e/y5749e05.htm>
- ✓ Soil and Health Library. Chapter V: Root Habits of Wheat. <http://soilandhealth.org/wp-content/uploads/01aglibrary/010139fieldcroproots/010139ch5.html> Accessed date: 4 April 2021
- ✓ Soil and Health Library. Chapter VIII: Root Habits of Barley. <http://soilandhealth.org/wp-content/uploads/01aglibrary/010139fieldcroproots/010139ch8.html> Accessed date: 4 April 2021.
- ✓ Saskatchewan Pulse Growers. Lentil Production Manual. [https://www.legumematrix.com/images/563/Lentil\\_Manual\\_Saskatchewan.pdf](https://www.legumematrix.com/images/563/Lentil_Manual_Saskatchewan.pdf)
- ✓ Sertse, D., You, F.M., Ravichandran, S., Cloutier, S., 2019. The Complex Genetic Architecture of Early Root and Shoot Traits in Flax Revealed by Genome-Wide Association Analyses. *Front Plant Sci.*, 10: 1483.
- ✓ Gloaguen, R.M., Couch, A., Rowland, D.L., Bennett, J., Hochmuth, G., Langham, D.R., Brym, Z.T., 2019. Root life history of non-dehiscent sesame (*Sesamum indicum* L.) cultivars and the relationship with canopy development. *Field Crops Research*, 241, 107560.

**Supplementary Table S2.** Annual Quantities of Fertilizers for Various Crops (Kg/hectare/year)

| Crops ID | Winter crop     | Nitrogen*, kg/ha | Phosphorus*, kg/ha |
|----------|-----------------|------------------|--------------------|
| 1        | Wheat           | 234              | 52                 |
| 2        | Long clover     | 143              | 91                 |
| 3        | Barley          | 58.5             | 19.5               |
| 4        | Sugar Beet      | 78               | 104                |
| 5        | Garlic          | 143              | 52                 |
| 6        | Tomato          | 390              | 143                |
| 7        | Other vegetable | 325              | 279.5              |
| 8        | Onion           | 188.5            | 52                 |
| 9        | Other crops     | 65               | 182                |
| 10       | Broad Bean      | 98               | 250                |
| 11       | Lentil          | 234              | 52                 |
| 12       | Flax            | 80               | 45                 |
| 13       | Tahrish         | 390              | 188.5              |
| 14       | Potatoes        | 390              | 188.5              |
| Crops ID | Summer crop     | Nitrogen, kg/ha  | Phosphorus, kg/ha  |
| 1        | Maize           | 377              | 71.5               |
| 2        | Cotton          | 221              | 71.5               |
| 3        | Onion           | 188.5            | 52                 |
| 4        | Tomato          | 390              | 143                |
| 5        | Other vegetable | 325              | 279.5              |
| 6        | Sorghum         | 416              | 91                 |
| 7        | Other crops     | 65               | 182                |
| 8        | Rice            | 188.5            | 52                 |
| 9        | Soybeans        | 123.5            | 91                 |
| 10       | Peanuts         | 123.5            | 91                 |
| 11       | Potatoes        | 390              | 188.5              |
| 12       | Yellow Maize    | 377              | 71.5               |
| 13       | Sesame          | 46               | 10                 |
| 14       | Sunflower       | 416              | 91                 |

\*Annual quantities of fertilizers multiplied by 1.3

Sources:

- ✓ FAO, 2005, *Fertilizer use by crop in Egypt*, Food and Agriculture Organization of the United Nations, Rome.
- ✓ Rasul, G.A.M., 2018. Effect of level combinations of nitrogen and phosphorus fertilizers on growth and yield of faba bean (*Vicia faba* L.) in a calcareous soil from Sulaimani province. *Journal of Zankoy Sulaimani Part-A- (Pure and Applied Sciences)*, 20–1: 81-88.
- ✓ Holzapfel, C. 2015. *Optimal Nitrogen, Phosphorus and Sulphur Fertility in Flax*. Indian Head Agricultural Research Foundation, Saskatchewan Flax Development Commission (Project #15-2424). <https://iharf.ca/wp-content/uploads/2016/04/Optimal-Nitrogen-Phosphorus-and-Sulphur-Fertility-in-Flax.pdf>
- ✓ Adisu T., Anbesse B., Tamene D. 2020. Effect of Nitrogen and Phosphorus on Yield and Yield Components of Sesame (*Sesamum Indicum* L.) at Kamashi Zone of Benshangul Gumuz under Balanced Fertilizer. *Adv Tech Biol Med.* 8:276; doi: 10.4172/2379-1764.1000276

**Supplementary Table S3.** Annual Quantities of FYM for Various Crops (Kg/hectare/year)

| Crops ID | Winter crop     | FYM, kg/ha/year |
|----------|-----------------|-----------------|
| 1        | Wheat           | 12,000          |
| 2        | Long clover     | 25,000          |
| 3        | Barley          | 12,000          |
| 4        | Sugar Beet      | 21,000          |
| 5        | Garlic          | 13,000          |
| 6        | Tomato          | 22,000          |
| 7        | Other vegetable | 21,000          |
| 8        | Onion           | 15,000          |
| 9        | Other crops     | 12,000          |
| 10       | Broad Bean      | 8,000           |
| 11       | Lentil          | 10,000          |
| 12       | Flax            | 20,000          |
| 13       | Tahrish         | 21,000          |
| 14       | Potatoes        | 21,000          |
| Crops ID | Summer crop     | FYM, kg/ha      |
| 1        | Maize           | 8,000           |
| 2        | Cotton          | 12,000          |
| 3        | Onion           | 15,000          |
| 4        | Tomato          | 22,000          |
| 5        | Other vegetable | 21,000          |
| 6        | Sorghum         | 12,000          |
| 7        | Other crops     | 12,000          |
| 8        | Rice            | 12,000          |
| 9        | Soybeans        | 16,000          |
| 10       | Peanuts         | 16,000          |
| 11       | Potatoes        | 21,000          |
| 12       | Yellow Maize    | 8,000           |
| 13       | Sesame          | 12,500          |
| 14       | Sunflower       | 20,000          |

Sources:

- ✓ Katak P., Babu S.C. 2001, *the Rice-Wheat Cropping System of South Asia: Efficient Production Management*, Food Products Press, NY, USA.
- ✓ Krishnamurthi, K.K. 2016. *Organic Agriculture for Sustainability*", Notion Press, Chetpet, Chennai.
- ✓ FAO, 1982. *Fertilizer Use Under Multiple Cropping Systems: Report of an Expert*", New Delhi.
- ✓ Powlson, D.S., Smith, P., Smith, J.U., 1996. *Evaluation of Soil Organic Matter Models: Using Existing Long-Term Datasets*, Springer-Verlag Berlin Heidelberg. ISBN: 978-3-642-61094-3.
- ✓ Rasool, F.U., Hasan, B., Jehangir, I.A., Ganie, S.A., 2013. *Effect of nitrogen, sulphur and farmyard manure on growth dynamics and yield of sunflower (Helianthus annuus L.) under temperate conditions*, *Scientific Research and Essays*, 8(43): 2144-2147.
- ✓ Ganeshamurthy, A.N., Reddy, K.S., 2000. *Effect of Integrated Use of Farmyard Manure and Sulphur in a Soybean and Wheat Cropping System on Nodulation, Dry Matter Production and Chlorophyll Content of Soybean on Swell-Shrink Soils in Central India*, *Journal of Agronomy and Crop Science*, 185(2): 91-97.
- ✓ Kaliba, A.R., 1998, *Adoption of maize production technologies in central Tanzania, Mexico, D.F: International Maize and Wheat Improvement Center (CIMMYT)*.

- ✓ Sharma, R.P., Datt, N., Sharma P.K., 2003. Combined application of nitrogen, phosphorus, potassium and farmyard manure in onion (*Allium cepa*) under high hills, dry temperate conditions of north-western Himalayas, *Indian Journal of Agricultural Sciences*, 73(4): 225-227.
- ✓ Das, A., Shivay, Y.S., Prasad, M., 2010. Effects of prilled urea, farmyard manure and *Azotobacter* on the cotton– wheat cropping system for realizing higher yield potential on Ustochrepts of Indo-Gangetic plain, *The Journal of Faculty of Food and Agriculture*, 87(3): 108-116.
- ✓ Agegnehu, G., Bekele, T., Tesfaye, A. 2005. Phosphorus Fertiliser and Farmyard Manure Effects on the Growth and Yield of Faba Bean and Some Soil Chemical Properties in an Acidic Nitisols of the Central Highlands of Ethiopia. *Ethiopian Journal of Natural Resources*, 7(1): 23-39.
- ✓ Janmohammadi, M., Nasiri, Y., Zandi, H., Kor-Abdali, M., Sabaghnia, N. 2014. Effect of Manure and Foliar Application of Growth Regulators on Lentil (*Lens Culinaris*) Performance in Semi-Arid Highland Environment. *Botanica Lithuanica*, 20(2): 99–108.
